# Supplementary material
Source: PubMed Central journal article supplement (PMC5886214)

## SUPPLEMENTARY FIGURES

### **Figure S1. Hepatic Tm6sf2 overexpression suppresses plasma lipid levels.**

(A) Changes in plasma lipid levels 2 weeks after AAV-Null or AAV-Tm6sf2 virus injection (n = 8 mice per group). Percent changes relative to pre-injection values are shown. (B) Time-course of plasma lipid levels (n = 8 mice per group). (C) Assessment of hepatic transduction efficiency 10 days after injection of mice with different doses of AAV-GFP vector. Percent GFP-positive cells were quantified in DAPI-stained liver sections using confocal fluorescence microscopy (n = 4 mice per group). (D) Hepatic Tm6sf2 mRNA expression and (E) plasma lipid levels 4 weeks after injection with different doses of AAV-Tm6sf2 virus (n = 4-5 mice per group). Viral doses are shown as genome copies per mouse. Control vector (Null) was injected at  $1 \times 10^{12}$  gc/mouse. (F) Plasma lipid levels after overnight fasting (O/N fast) and overnight fasting followed by re-feeding for 4 hours at 7 weeks after AAV injection (n = 6-8 mice per group). (G) Expression of UPR genes in livers of AAV-treated mice 12 weeks after virus injection (uXbp1, unspliced Xbp1; sXbp1, spliced Xbp1; n = 5-8 mice per group). (H) Time-course of plasma lipid levels in AAV-injected mice on a high-fat diet for 16 weeks (n = 7-8 mice per group). (I) Plasma lipid levels in eight-week-old female *Ldlr*<sup>-/-</sup>; *ApoB*<sup>100/100</sup> mice injected with empty (Null) or Tm6sf2-expressing (Tm6) AAV, maintained on chow diet and analyzed 4 weeks after virus injection (n = 4-5 mice per group). (J) FPLC lipoprotein profiles of samples shown in H (pooled plasma from 4-5 mice per group). (K) Changes in plasma lipid levels in male and female

Ldlr<sup>-/-</sup>;ApoB<sup>100/100</sup> mice (n = 3-5 mice per group). Percent changes relative to pre-injection values are shown. Data are shown as the mean ± SEM. \*, p < 0.05 by Student's *t*-test.

Suppl Fig. 1

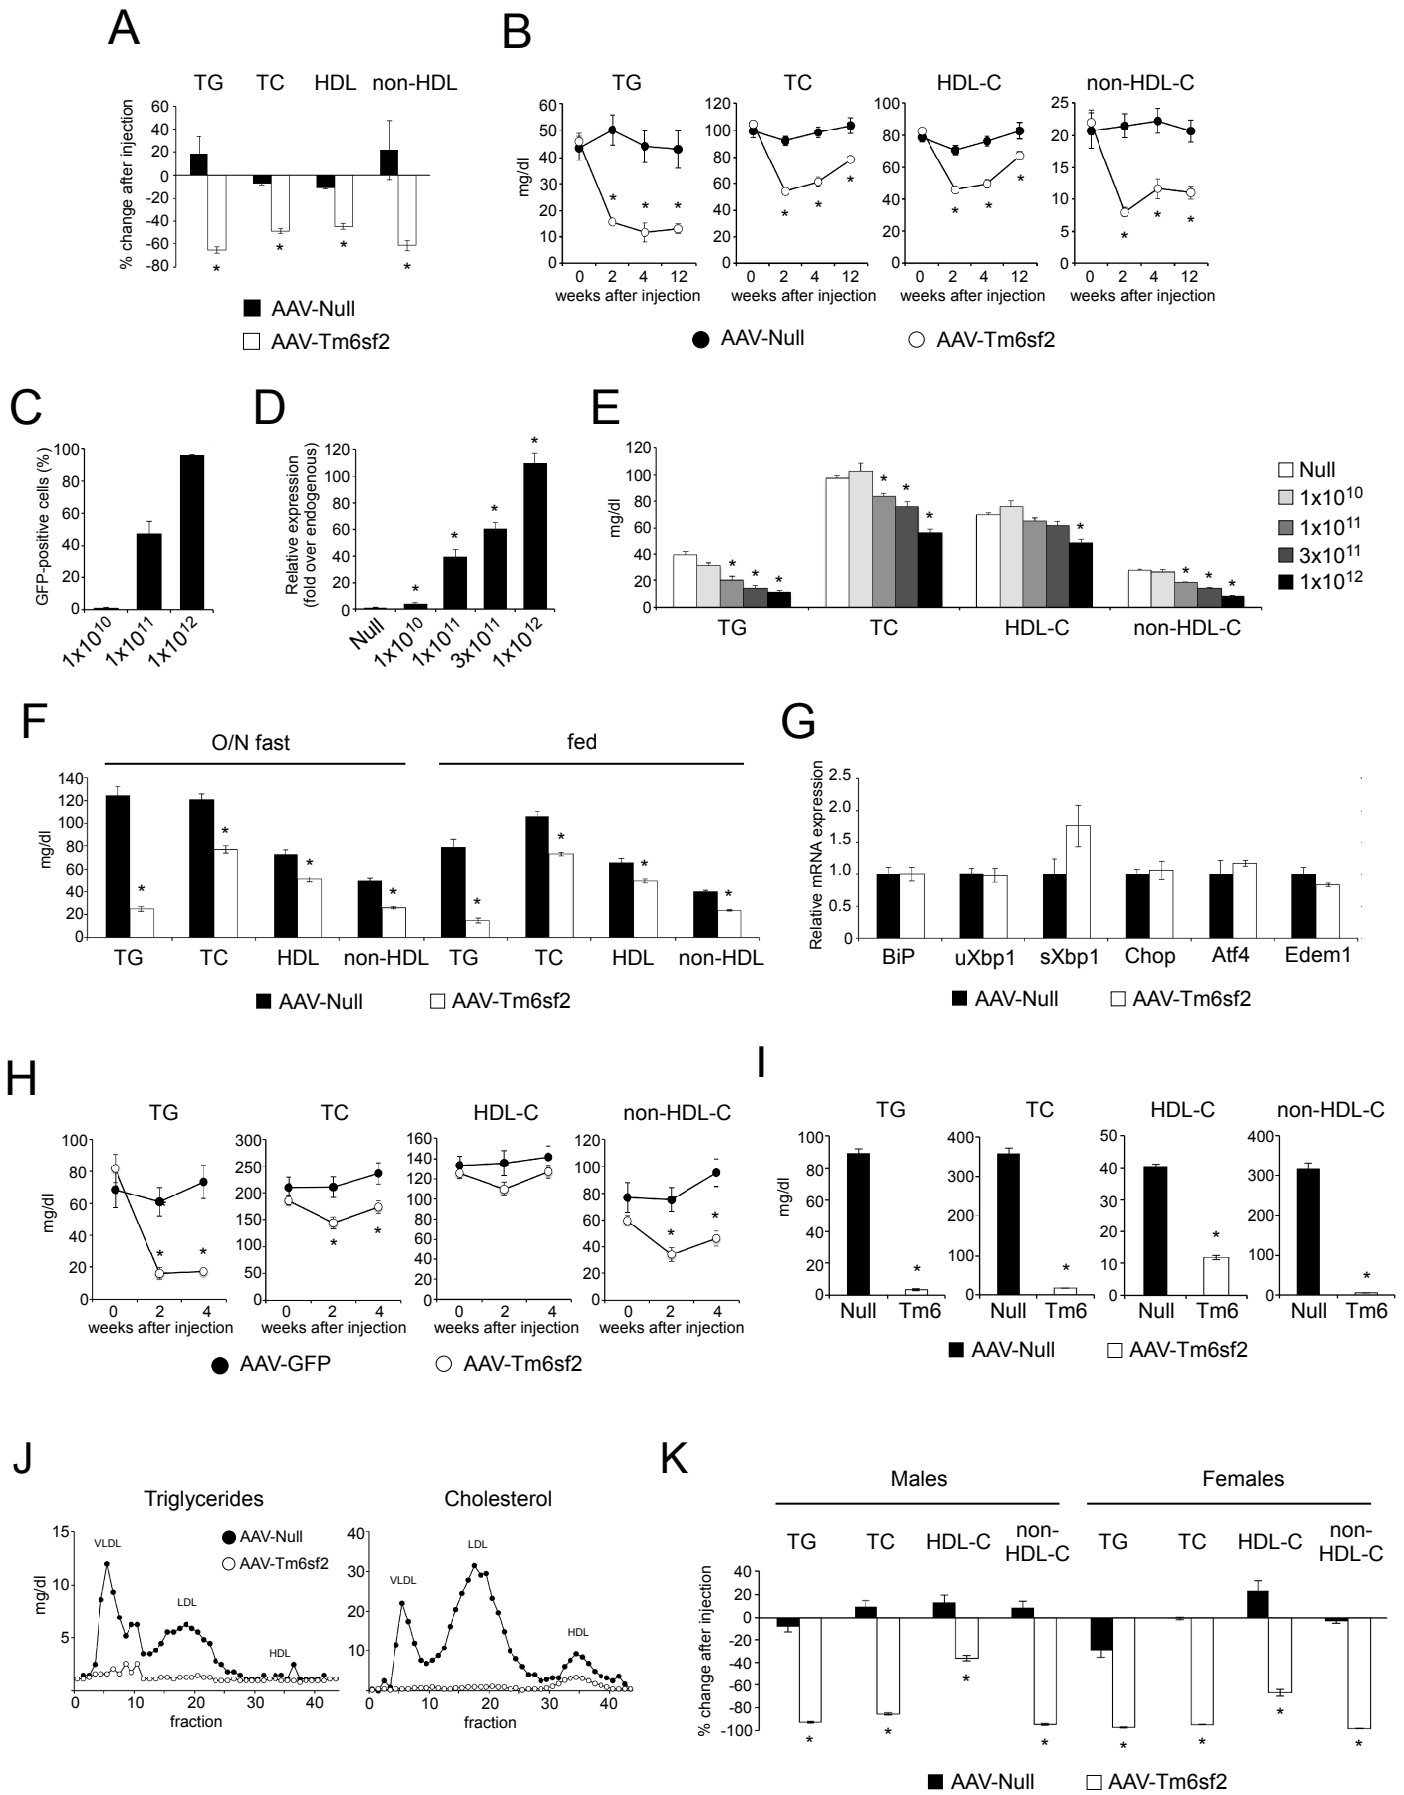

**Figure S2. Hepatic overexpression of human TM6SF2, but not mouse Tm6sf2, is associated with inflammation and reduced expression of UPR genes.** Male mice were injected with AAV-GFP, AAV-Tm6sf2 and AAV-TM6SF2 vectors ( $1 \times 10^{12}$  gc/mouse) and livers were analyzed 2 weeks later. (A) Representative histological sections showing pericentral inflammatory infiltrate in liver overexpressing TM6SF2, but not GFP or Tm6sf2. Three sections per liver representing different tissue regions were analyzed with similar results (n = 2-4 mice per group). (B) Relative mRNA levels of UPR genes (n = 2-4 mice per group). Data are shown as the mean  $\pm$  SEM. \*, p(vs. GFP) < 0.05 by Kruskal-Wallis test followed by Dunn's post hoc test.

Suppl Fig. 2

A

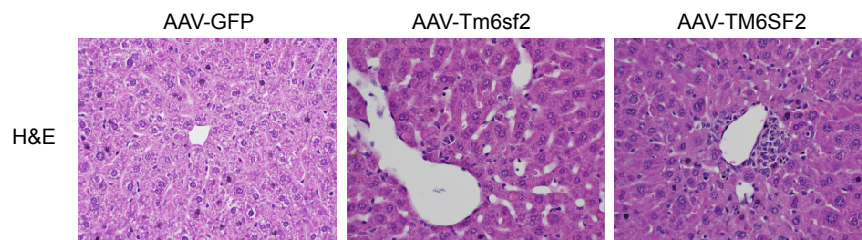

B

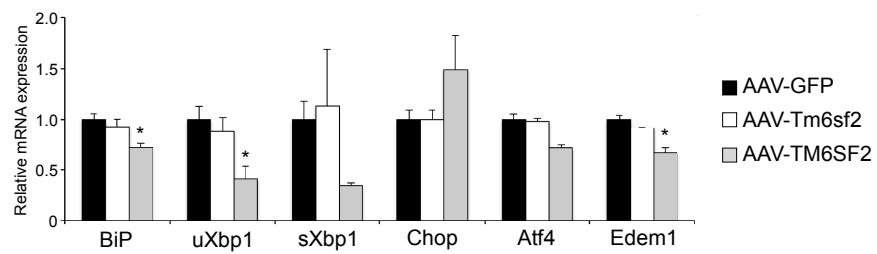

**Figure S3. Hepatic phenotype of mice overexpressing Tm6sf2.** (A) Hepatic cholesterol secretion was assessed after Pluronic F-127 injection in plasma samples shown in Fig. 3A. Changes in cholesterol concentration from preinjection (0 h) to 2 hours after Pluronic injection are shown (n = 4-5 mice per group). (B) Representative Trichrome-stained liver sections from mice shown in Fig. 3B, 12 weeks after AAV injection on chow diet. AAV-Tm6sf2 liver shows no sign of increased fibrosis. (C) Relative hepatic mRNA levels of selected genes involved in fatty acid (FA), triglyceride (TG), cholesterol and VLDL metabolism 12 weeks after injection with AAV-Null or AAV-Tm6sf2 virus (n = 5-8 mice per group). (D) Mttp activity in the livers of mice 12 weeks after injection with AAV-Null (Null) or AAV-Tm6sf2 (Tm6) virus (n = 5-8 mice per group). Data are shown as the mean  $\pm$  SEM. \*, p < 0.05 by Student's *t*-test.

Suppl Fig. 3

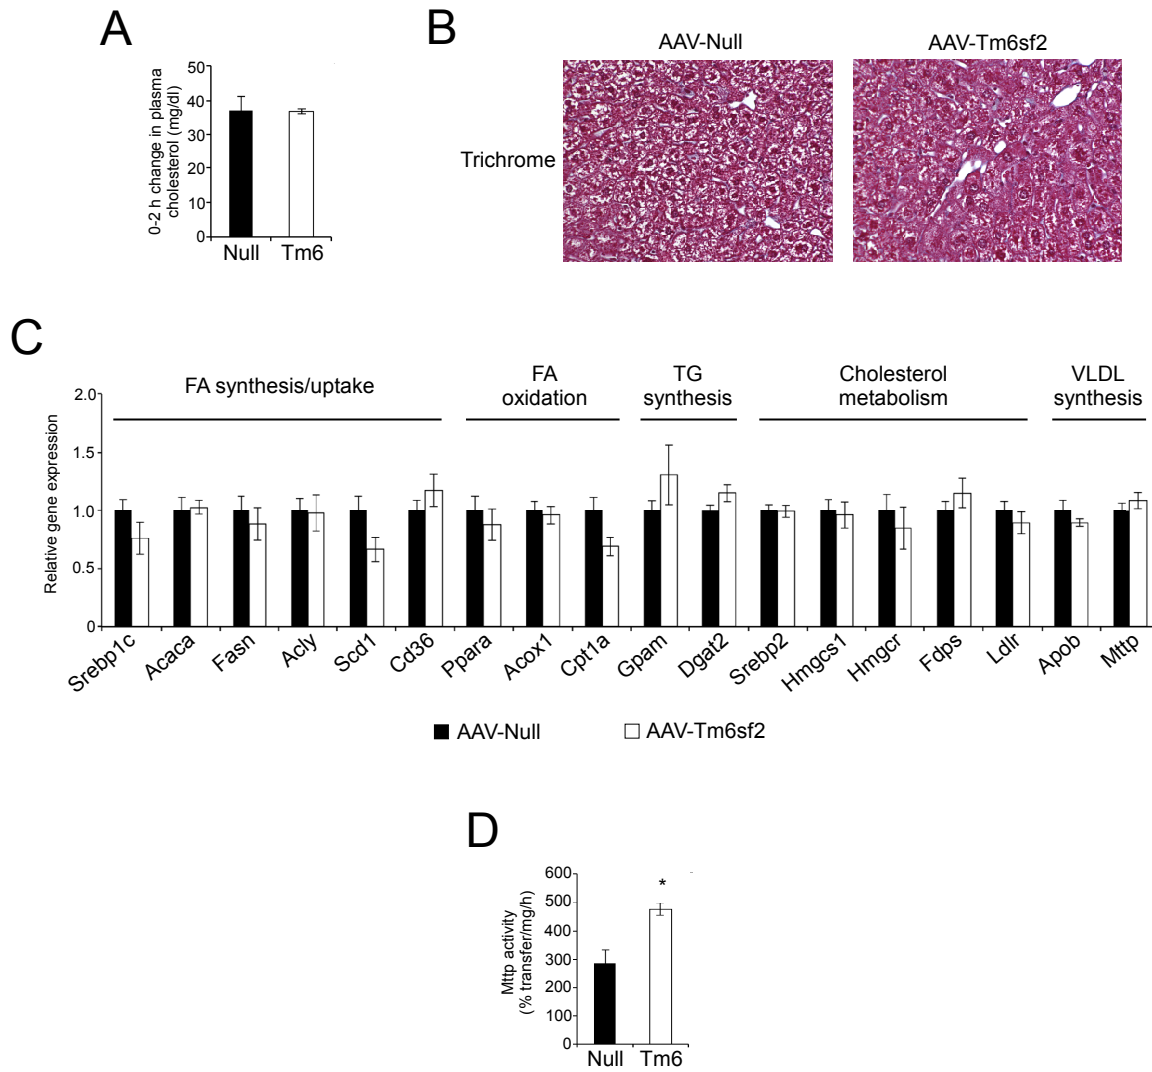

**Figure S4. Tm6sf2 overexpression suppresses APOB secretion without significantly impacting transcription of metabolic genes or MTTP activity.**

(A) Relative TM6SF2 mRNA levels in Huh7 cells expressing lentiviral mCherry (mCh) or TM6SF2 (Tm6) (n = 3 wells per group). (B) Relative TM6SF2 expression (left panel) and APOB secretion (right panel) in a Huh7 cell line derived independently from the one shown in A. Secreted APOB mass was normalized by concomitantly secreted albumin mass (n = 3 wells per group). (C) Albumin-normalized APOB secretion in primary iPSC-derived hepatocyte-like cells transduced with adenovirus expressing mCherry (mCh) or TM6SF2 (Tm6) (n = 3 wells per group). (D) Relative mRNA expression of selected genes involved in fatty acid (FA), triglyceride (TG), cholesterol and VLDL metabolism and ER stress in Huh7 cells overexpressing mCherry (LV-mCherry) or TM6SF2 (LV-TM6SF2) (n = 3 wells per group). (E) MTTP activity in Huh7 cells stably expressing mCherry (mCh) or TM6SF2 (Tm6) (n = 3 wells per group). Data are presented as the mean  $\pm$  SEM. \*, p < 0.05 by Student's *t*-test.



Suppl Fig. 4

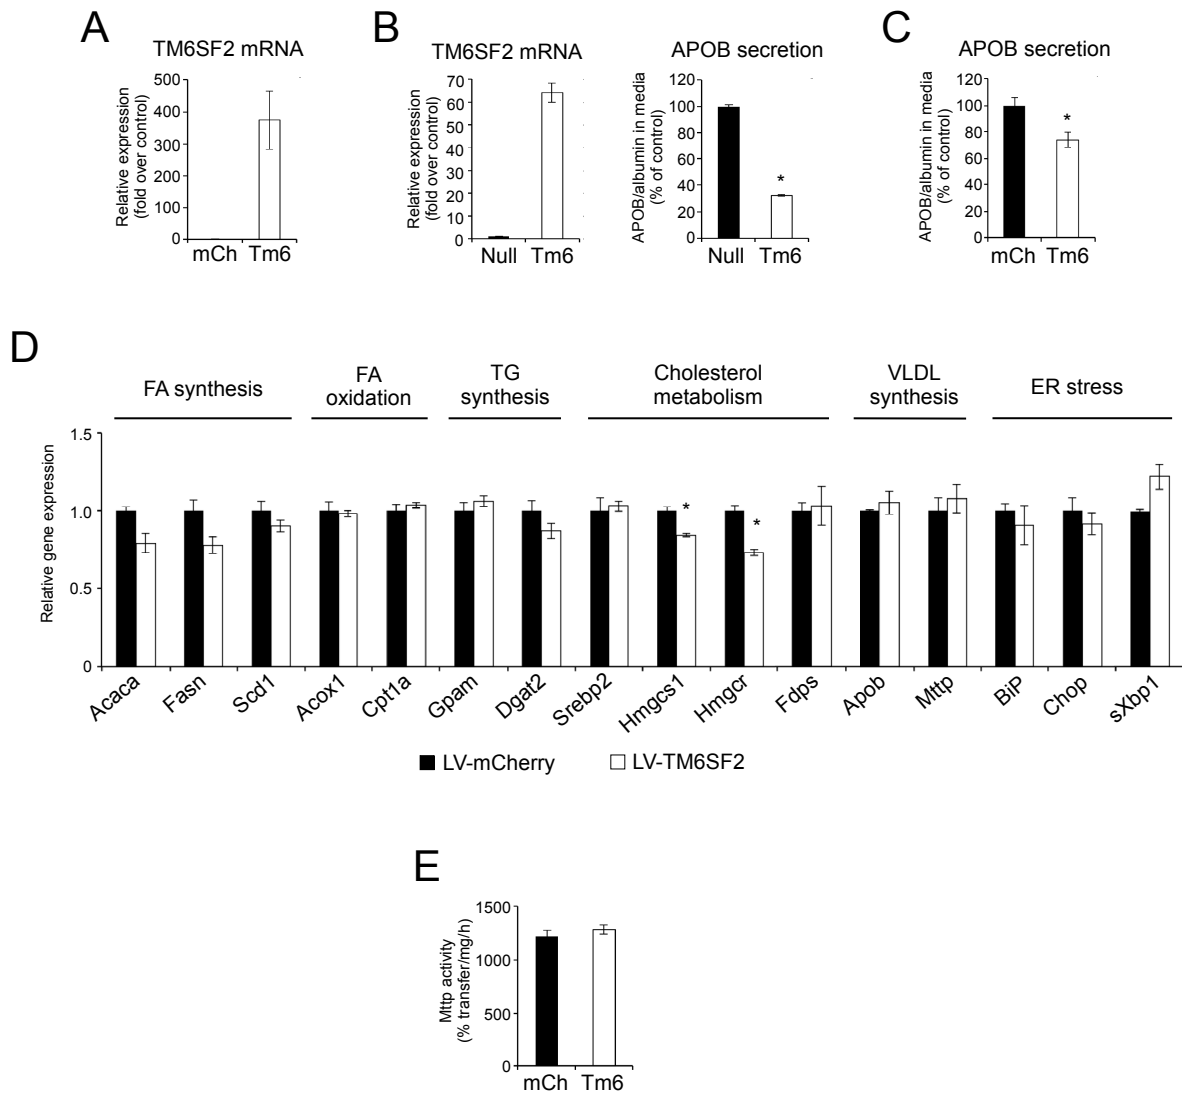

Supplement: ddx159_supp.pdf [file ddx159_supp.pdf]
